# Supplementary material
Source: publisher site journal article supplement (https://cdn.jamanetwork.com/ama/content_public/journal/jamanetworkopen/938673/zoi210111supp1_prod_1617280530.75082.pdf)
Supplement: Supplementary file [file zoi210111supp1_prod_1617280530.75082.pdf]

## Supplemental Online Content

Degenhardt L, Hungerford P, Nielsen S, et al. Pharmaceutical opioid use patterns and indicators of extramedical use and harm in adults with chronic noncancer pain, 2012-2018. *JAMA Netw Open*. 2021;4(4):e213059. doi:10.1001/jamanetworkopen.2021.3059

**eAppendix 1.** Descriptive Analyses

**eAppendix 2.** Missing Data Analysis

**eAppendix 3.** Additional Analyses

**eFigure 1.** Flowchart of the POINT Cohort

**eFigure 2.** Individual Level Trajectories of OME Consumption in the POINT Cohort Over 5 Years (N=805)

**eFigure 3.** Prevalence, Incidence, and Remission of a Range Opioid Use Behaviors and Indicators of Extramedical Opioid Use and Harm (Complete Case Data)

**eTable 1.** Baseline Characteristics of the POINT Cohort (n=1514)

**eTable 2.** Missing Data Across Interviews

**eTable 3.** The 10 Most Cost Common Patterns of Missing Data for Multiple Imputation

**eTable 4.** Complete Case Analysis of Prevalence, Incidence, and Cessation of a Range of Opioid Use Behaviors

**eTable 5.** Complete Case Analysis of Prevalence, Incidence, and Cessation of a Range of Indicators of Extramedical Opioid Use and Harm

**eTable 6.** Percentage of People Engaging in a Behavior on 1 Interview Who Ceased That Behavior in the Following Interview

**eTable 7.** Percentage of People Engaging in a Behavior on 1 Interview Who Ceased That Behavior in the Following Interview

**eTable 8.** Sensitivity Analysis ORBIT Items (Past 3 Month Use Only; Prevalence, Incidence, Number of Interviews)

**eTable 9.** Associations Between Demographic and Clinical Variables and Indicators for Past Year Dependence (Years 2-5 Only; Imputed Data)

**eReferences.**

This supplemental material has been provided by the authors to give readers additional information about their work.

## Appendix A: Descriptive Analyses

### eFigure 1: Flowchart of the POINT Cohort

eFigure 1: Overview of the POINT cohort retention over 5 years

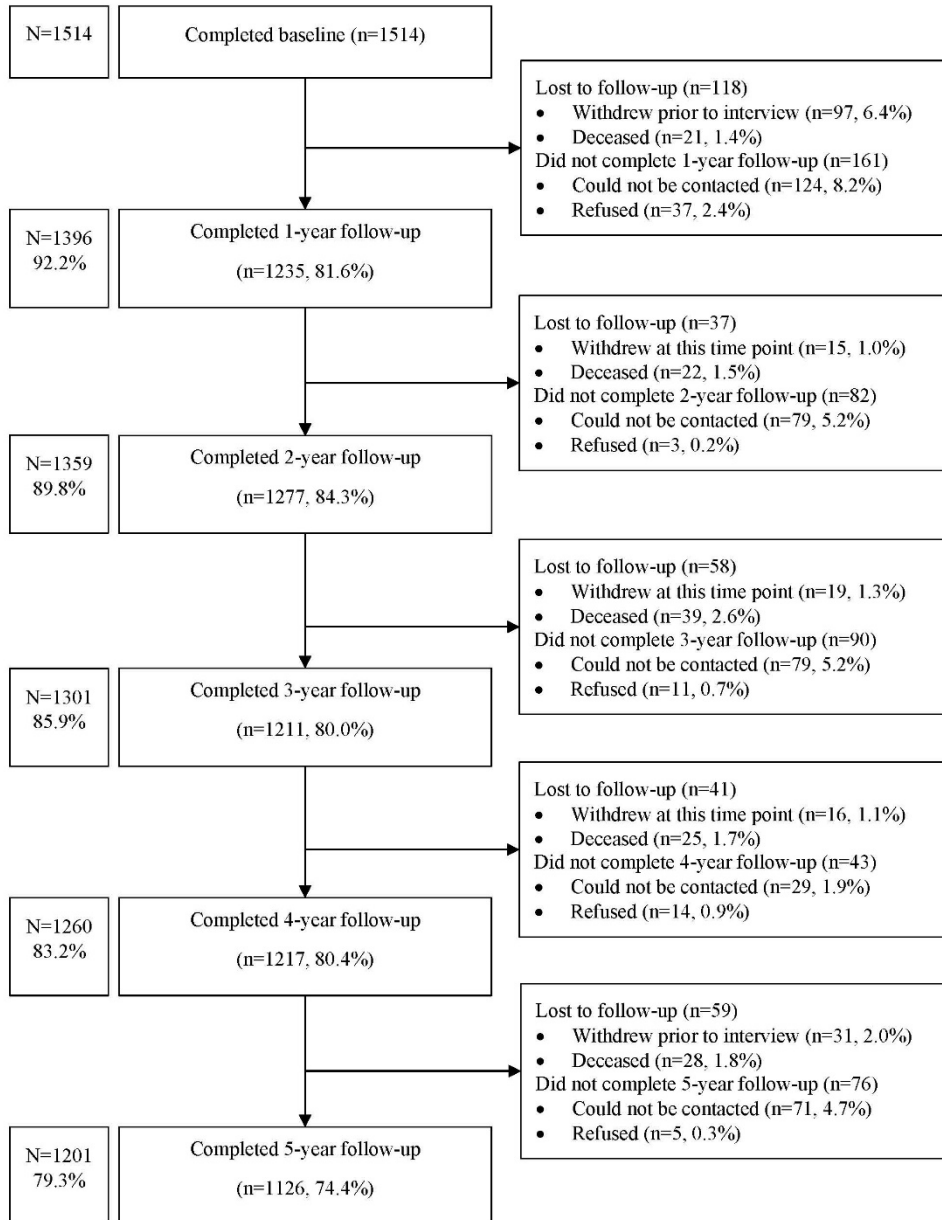

^Participants were contacted at each wave unless they had withdrawn from the study, or were reported to be deceased, even if not interviewed at the previous wave.

**eTable 1: Baseline Characteristics of the POINT Cohort (n=1514)**

| Demographics                                                    | Total (N=1514)      |
|-----------------------------------------------------------------|---------------------|
|                                                                 | No. (%)             |
| Age, median (IQR)                                               | 58.00 (48.00-67.00) |
| Sex                                                             |                     |
| Man                                                             | 672 (44.39)         |
| Woman                                                           | 842 (55.61)         |
| Employment status                                               |                     |
| Unemployed                                                      | 737 (48.68)         |
| Employment                                                      | 285 (18.82)         |
| Retired                                                         | 469 (30.98)         |
| SEIFA socio-economic advantage and disadvantage                 |                     |
| Quantile 1 (most disadvantaged)                                 | 390 (25.76)         |
| Quantile 2                                                      | 312 (20.61)         |
| Quantile 3                                                      | 359 (23.71)         |
| Quantile 4                                                      | 257 (16.97)         |
| Quantile 5 (most advantaged)                                    | 196 (12.95)         |
| Living in a major city <sup>a</sup>                             | 760 (50.20)         |
| <b>Pain and Physical Health</b>                                 |                     |
| Years living with pain, median (IQR)                            | 10.00 (4.54-20.00)  |
| Pain severity score, mean (SD)                                  | 5.08 (1.79)         |
| Pain interference score, mean (SD)                              | 5.72 (2.26)         |
| Pain self-efficacy score, mean (SD)                             | 29.19 (13.44)       |
| Intermediate/high PODS                                          | 50.53 (765)         |
| Pain conditions in past year                                    |                     |
| Arthritis or rheumatism                                         | 1015 (67.04)        |
| Back or neck problems                                           | 1206 (79.66)        |
| Frequent/severe headaches                                       | 679 (44.85)         |
| Visceral                                                        | 497 (32.83)         |
| No. chronic pain conditions in the past 12 months, median (IQR) | 2.00 (1.00-3.00)    |
| Short Form-12 physical health score, median (IQR)               | 26.52 (22.25-31.09) |
| Years using prescribed opioids, median (IQR)                    | 4.00 (1.58-10.00)   |
| <b>Mental health and substance use history</b>                  |                     |
| Moderate/severe depression (PHQ)                                | 706 (46.63)         |
| Moderate/severe anxiety (GAD)                                   | 342 (22.59)         |
| Childhood abuse/neglect                                         | 793 (52.38)         |
| Lifetime ICD-10 substance dependence <sup>b</sup>               | 317 (20.94)         |
| Overdosed in the past 12 months                                 | 42 (2.77)           |

Abbreviations: GAD, general anxiety disorder; IQR, interquartile range; PHQ, patient health questionnaire; POINT, Pain and Opioids IN Treatment; SD, standard deviation.

<sup>a</sup>As measured by the Accessibility/Remoteness Index of Australia.

<sup>b</sup>International Statistical Classification of Diseases and Related Health Problems, 10th Revision (ICD-10).

<sup>c</sup>Substances included alcohol, cocaine, heroin, cannabis, methamphetamine, hallucinogens, benzodiazepines, ecstasy, inhalants.

**eFigure 2: Individual level trajectories of OME consumption in the POINT cohort over 5 years (N=805)**

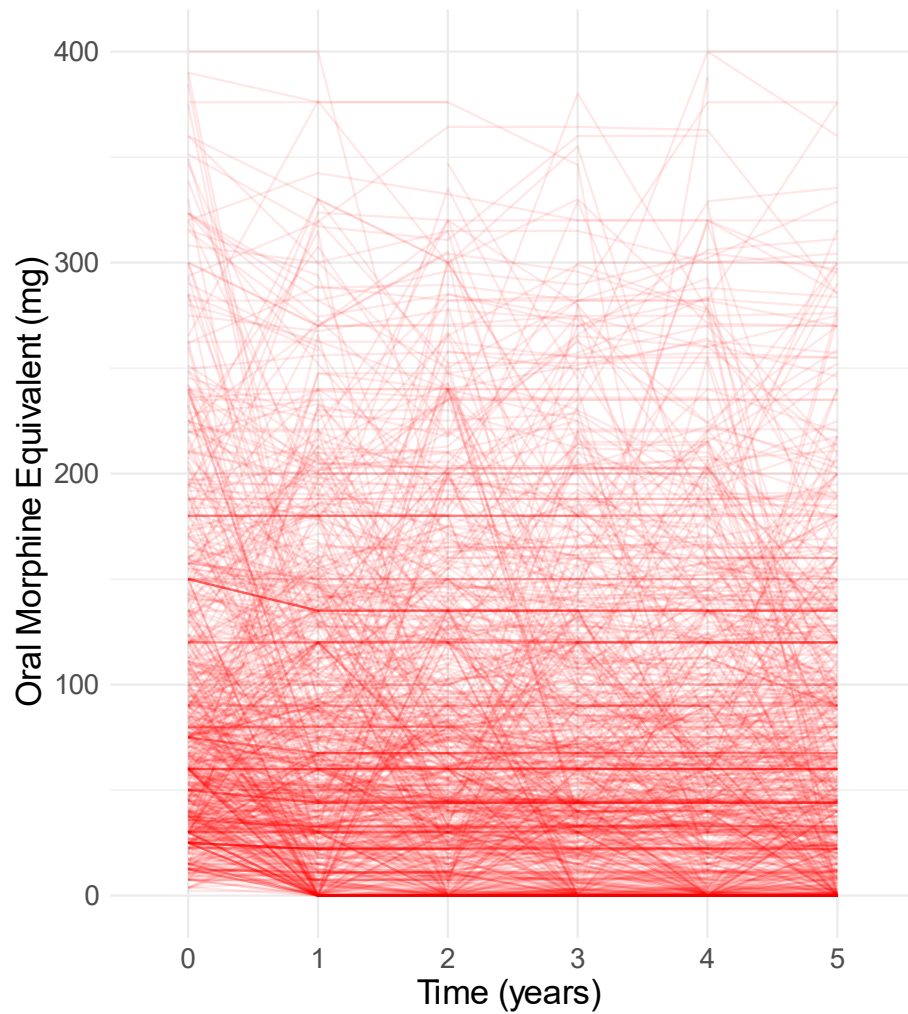

Abbreviation: OME, oral morphine equivalent; POINT, Pain and Opioids IN Treatment (POINT).

Each person is 1 line, y-axis is oral morphine equivalent (OME) mg per day. This is complete case data.

## Appendix B: Missing Data Analysis

Of the 1514 participants at baseline, 986 had complete data and 137 died throughout the study period (**Table C1**). There were 9084 rows of data for 1514 participants and 6 time periods. As 116 participants had died, these rows (n=390) were censored (N=8694). **Table C2** shows the top 10 patterns of missing data. There were 17 variables that were subject to missingness ranging from 35% missing to 0.07%. In order from highest missing to least these were: *International Statistical Classification of Diseases and Related Health Problems, Tenth Revision (ICD-10)* opioid dependence, *ICD-10* substance dependence, overdose, pain self-efficacy questionnaire, patient concerns about opioid use (PODS), Short form 12 physical component score (SF12), very high OME, employment, tampered with medication or used via other route, requested an increased dose, early script renewal, sold or gave own prescribed opioids to another person, anxiety (GAD), pain interference, depression (PHQ), pain severity, ceased taking schedule eight opioids, child abuse/neglect, and number of years continuously taking opioids. Number of overdoses in the last 12 months, Pain Self Efficacy Questionnaire and *ICD-10* Pharmaceutical Opioid Dependence were not collected during the self-complete year 1 follow-up.

To reduce bias arising from missing data, multiple imputation was conducted using Fully Conditional Specification (FCS)<sup>1</sup> fit with the R-package mice (CRAN).<sup>2</sup> Of the 234 738 datapoints, 28 386 were missing (12%). Previous research suggests that the number of imputations should be determined by the percent of data missing.<sup>3,4</sup> Based on this, we used 20 imputed datasets in order to minimize sampling variability. All variables were included in the imputation with the inclusion of auxiliary variables. Auxiliary variables have been suggested to improve imputation estimation estimates<sup>5,6</sup> and reduce bias in the imputed datasets.<sup>7,8</sup> These variables were the remaining ORBIT items,<sup>9</sup> parental substance use and expected duration to be on opioid medication, both of which were collected at baseline. Imputation performance were assessed comparing density plots of imputed data with observed and by monitoring imputation convergence diagnostics. Results were calculated using Rubin rules.<sup>1</sup>

**eTable 2: Missing Data Across Interviews**

|                                                        | <b>Baseline<br/>(N=1514)</b> | <b>Year 1<br/>( 17% attrition)</b> | <b>Year 2<br/>( 13% attrition)</b> | <b>Year 3<br/>( 16% attrition)</b> | <b>Year 4<br/>( 13% attrition)</b> | <b>Year 5<br/>( 18% attrition)</b> |
|--------------------------------------------------------|------------------------------|------------------------------------|------------------------------------|------------------------------------|------------------------------------|------------------------------------|
| <b>Variable</b>                                        |                              |                                    |                                    |                                    |                                    |                                    |
| Followed up (n)                                        | 1514                         | 1235                               | 1277                               | 1210                               | 1217                               | 1125                               |
| Attrition (n)                                          | 0                            | 259                                | 194                                | 222                                | 189                                | 252                                |
| Mortality (n) (N=137)                                  | 0                            | 20                                 | 23                                 | 39                                 | 26                                 | 29                                 |
| Rows missing due to mortality (n)                      | 0                            | 20                                 | 43                                 | 82                                 | 108                                | 137                                |
|                                                        | <b>Missing, %</b>            |                                    |                                    |                                    |                                    |                                    |
| <b>Demographics %</b>                                  |                              |                                    |                                    |                                    |                                    |                                    |
| Age                                                    | 0                            | 0                                  | 0                                  | 0                                  | 0                                  | 0                                  |
| Sex                                                    | 0                            | 0                                  | 0                                  | 0                                  | 0                                  | 0                                  |
| Employment status                                      | 1.52                         | 25.17                              | 17.34                              | 18.72                              | 18.78                              | 24.76                              |
| SEIFA socioeconomic advantage and disadvantage         | 0                            | 0                                  | 0                                  | 0                                  | 0                                  | 0                                  |
| Living in a major city <sup>a</sup>                    | 0                            | 0                                  | 0                                  | 0                                  | 0                                  | 0                                  |
| <b>Pain and Physical Health %</b>                      |                              |                                    |                                    |                                    |                                    |                                    |
| Median Years living with pain                          | 0                            | 0                                  | 0                                  | 0                                  | 0                                  | 0                                  |
| Pain severity score                                    | 0                            | 17.54                              | 13.32                              | 15.5                               | 13.44                              | 18.3                               |
| Pain interference score                                | 0.13                         | 17.6                               | 13.94                              | 15.64                              | 13.51                              | 18.66                              |
| Pain self-efficacy score <sup>b</sup>                  | 2.18                         | 100                                | 13.32                              | 15.78                              | 14.37                              | 19.17                              |
| Intermediate/high POD                                  | 18.1                         | 18.67                              | 13.32                              | 15.64                              | 13.51                              | 19.17                              |
| Median Short Form-12 physical health score             | 21.73                        | 24.36                              | 14.48                              | 17.32                              | 15.01                              | 20.77                              |
| Median years using prescribed opioids                  | 0.07                         | 0.07                               | 0.07                               | 0.07                               | 0.07                               | 0.07                               |
| <b>Mental health and substance use history %</b>       |                              |                                    |                                    |                                    |                                    |                                    |
| Moderate/severe depression (PHQ)                       | 0.2                          | 18.01                              | 13.46                              | 15.71                              | 13.58                              | 18.52                              |
| Moderate/severe anxiety (GAD)                          | 0.33                         | 19.28                              | 13.53                              | 16.13                              | 13.58                              | 18.74                              |
| Childhood abuse/neglect                                | 6.54                         | 6.36                               | 6.46                               | 6.49                               | 6.4                                | 6.46                               |
| Lifetime ICD-10 substance dependence <sup>c</sup>      | 32.63                        | 32.53                              | 32.63                              | 33.03                              | 32.93                              | 32.97                              |
| Overdosed in the past 12 months <sup>b</sup>           | 10.5                         | 97.66                              | 13.39                              | 15.5                               | 13.44                              | 18.3                               |
| <b>Outcomes %</b>                                      |                              |                                    |                                    |                                    |                                    |                                    |
| Very high dose                                         | 25.63                        | 18.88                              | 13.6                               | 15.85                              | 13.58                              | 18.45                              |
| Requested an increased dose                            | 0.59                         | 20.35                              | 13.39                              | 15.57                              | 13.58                              | 18.74                              |
| Early script renewal                                   | 0.59                         | 20.21                              | 13.39                              | 15.57                              | 13.58                              | 18.74                              |
| Ceased taking opioids                                  | 0                            | 18.07                              | 13.32                              | 15.57                              | 13.44                              | 18.3                               |
| Tampered with medication or used via other route       | 0.59                         | 20.28                              | 13.39                              | 15.57                              | 13.66                              | 18.74                              |
| Sold or gave own prescribed opioids to another person  | 0.59                         | 20.55                              | 13.39                              | 15.57                              | 13.73                              | 18.74                              |
| ICD-10 – Pharmaceutical Opioid Dependence <sup>b</sup> | 6.27                         | 97.66                              | 14.07                              | 15.85                              | 13.87                              | 18.95                              |

Abbreviations: ICD-10, *International Statistical Classification of Diseases and Related Health Problems, Tenth Revision*; PHQ: Patient Health Questionnaire; GAD General Anxiety Disorder questionnaire.

<sup>a</sup>As measured by the Accessibility/Remoteness Index of Australia

<sup>b</sup>Not collected at 1-year follow-up

<sup>c</sup>Substances included alcohol, cocaine, heroin, cannabis, methamphetamine, hallucinogens, benzodiazepines, ecstasy, inhalants.

**eTable 3: The 10 Most Cost Common Patterns of Missing Data for Multiple Imputation<sup>a</sup>**

| Pattern                                        | Frequency | Variables                             |                                           |                        |          |                                             |                                 |               |                   |          |                             |                                               |                      |               |                        |                  |                       |                    | No. variables             |   |    |
|------------------------------------------------|-----------|---------------------------------------|-------------------------------------------|------------------------|----------|---------------------------------------------|---------------------------------|---------------|-------------------|----------|-----------------------------|-----------------------------------------------|----------------------|---------------|------------------------|------------------|-----------------------|--------------------|---------------------------|---|----|
|                                                |           | ICD-10 - Substance dependence history | ICD-10 - pharmaceutical opioid dependence | Low Pain self-efficacy | Overdose | Patient concerns about their own opioid use | Short Form 12 Physical Function | Very High OME | Employment status | Tampered | Requested an increased dose | Sold or gave own prescribed to another person | Early script renewal | Anxiety (GAD) | BPI: Pain Interference | Depression (PHQ) | Ceased taking opioids | BPI: Pain Severity | Childhood abuse / neglect |   |    |
| 1                                              | 1352      | X                                     |                                           |                        |          |                                             |                                 |               |                   |          |                             |                                               |                      |               |                        |                  |                       |                    |                           |   | 1  |
| 2                                              | 697       |                                       | X                                         | X                      | X        | X                                           | X                               | X             | X                 | X        | X                           | X                                             | X                    | X             | X                      | X                | X                     | X                  | X                         |   | 16 |
| 3                                              | 619       |                                       | X                                         | X                      | X        |                                             |                                 |               |                   |          |                             |                                               |                      |               |                        |                  |                       |                    |                           |   | 3  |
| 4                                              | 311       | X                                     | X                                         | X                      | X        | X                                           | X                               | X             | X                 | X        | X                           | X                                             | X                    | X             | X                      | X                | X                     | X                  | X                         |   | 17 |
| 5                                              | 242       | X                                     | X                                         | X                      | X        |                                             |                                 |               |                   |          |                             |                                               |                      |               |                        |                  |                       |                    |                           |   | 4  |
| 6                                              | 199       |                                       |                                           |                        |          | X                                           |                                 |               |                   |          |                             |                                               |                      |               |                        |                  |                       |                    |                           |   | 1  |
| 7                                              | 197       | X                                     |                                           |                        |          |                                             |                                 |               |                   |          |                             |                                               |                      |               |                        |                  |                       |                    | X                         |   | 2  |
| 8                                              | 149       |                                       |                                           |                        |          |                                             |                                 |               | X                 |          |                             |                                               |                      |               |                        |                  |                       |                    |                           |   | 1  |
| 9                                              | 148       |                                       |                                           |                        |          | X                                           | X                               | X             |                   |          |                             |                                               |                      |               |                        |                  |                       |                    |                           |   | 3  |
| 10                                             | 100       | X                                     | X                                         | X                      | X        | X                                           | X                               | X             | X                 | X        | X                           | X                                             | X                    | X             | X                      | X                | X                     | X                  | X                         | X | 18 |
| No. missing values for given variable (N=8694) | 27516     | 2850                                  | 2444                                      | 2415                   | 2316     | 1768                                        | 1651                            | 1542          | 1527              | 1187     | 1182                        | 1182                                          | 1180                 | 1172          | 1141                   | 1141             | 1130                  | 1121               | 561                       |   |    |

Abbreviations: ICD-10, International Statistical Classification of Diseases and Related Health Problems, Tenth Revision; OME, oral morphine equivalent.

<sup>a</sup>Missing data reported in long form with multiple observations per individual. Row totals indicate total number missing for variable; Column totals indicate number missing in specific pattern; X indicates missing data for variable in that pattern



## Appendix C: Additional Analyses

**eTable 4: Complete Case Analysis of Prevalence, Incidence, and Cessation of a Range of Opioid Use Behaviors**

| Outcomes                                                       | Very high dose<br>(≥ 200 mg OME per day)<br>% (95% CI)<br>n=805 | Requested an increased<br>dose<br>% (95% CI)<br>n = 947 | Early prescription<br>renewal<br>% (95% CI)<br>n = 947 | Ceased taking prescribed<br>opioids<br>% (95% CI)<br>n = 980 |
|----------------------------------------------------------------|-----------------------------------------------------------------|---------------------------------------------------------|--------------------------------------------------------|--------------------------------------------------------------|
| Prevalence of this behaviour at...                             |                                                                 |                                                         |                                                        |                                                              |
| baseline                                                       | 13.42 (12.70-14.13)                                             | 21.65 (20.74-22.56)                                     | 11.62 (10.95-12.28)                                    |                                                              |
| 1                                                              | 12.42 (11.73-13.11)                                             | 26.40 (25.39-27.41)                                     | 15.63 (14.85-16.40)                                    | 10.61 (9.97-11.25)                                           |
| 2                                                              | 12.92 (12.22-13.62)                                             | 15.31 (14.54-16.08)                                     | 8.24 (7.67-8.80)                                       | 13.88 (13.15-14.61)                                          |
| 3                                                              | 12.30 (11.61-12.99)                                             | 15.73 (14.96-16.51)                                     | 8.55 (7.98-9.13)                                       | 16.73 (15.93-17.54)                                          |
| 4                                                              | 11.43 (10.77-12.09)                                             | 14.15 (13.41-14.89)                                     | 6.02 (5.54-6.50)                                       | 20.82 (19.92-21.71)                                          |
| 5                                                              | 10.06 (9.44-10.68)                                              | 8.55 (7.98-9.13)                                        | 4.75 (4.32-5.18)                                       | 24.49 (23.52-25.46)                                          |
| Incidence of this behaviour (from previous year) at..., y      |                                                                 |                                                         |                                                        |                                                              |
| 1                                                              | 3.98 (3.58-4.37)                                                | 17.21 (16.40-18.02)                                     | 10.35 (9.72-10.98)                                     | 10.61 (9.97-11.25)                                           |
| 2                                                              | 3.60 (3.23-3.97)                                                | 8.55 (7.98-9.13)                                        | 4.12 (3.72-4.52)                                       | 7.35 (6.82-7.88)                                             |
| 3                                                              | 2.73 (2.41-3.06)                                                | 10.77 (10.13-11.41)                                     | 5.28 (4.83-5.73)                                       | 6.12 (5.64-6.61)                                             |
| 4                                                              | 2.36 (2.06-2.66)                                                | 8.24 (7.67-8.80)                                        | 3.06 (2.72-3.41)                                       | 6.73 (6.23-7.24)                                             |
| 5                                                              | 2.11 (1.83-2.40)                                                | 4.75 (4.32-5.18)                                        | 2.64 (2.32-2.96)                                       | 6.94 (6.42-7.45)                                             |
| Cessation of this behaviour (from previous year) at..., y      |                                                                 |                                                         |                                                        |                                                              |
| 1                                                              | 4.97 (4.53-5.41)                                                | 12.46 (11.77-13.15)                                     | 6.34 (5.84-6.83)                                       |                                                              |
| 2                                                              | 3.11 (2.76-3.45)                                                | 19.64 (18.77-20.51)                                     | 11.51 (10.85-12.17)                                    | 4.08 (3.69-4.48)                                             |
| 3                                                              | 3.35 (3.00-3.71)                                                | 10.35 (9.72-10.98)                                      | 4.96 (4.53-5.40)                                       | 3.27 (2.91-3.62)                                             |
| 4                                                              | 3.23 (2.88-3.58)                                                | 9.82 (9.21-10.43)                                       | 5.60 (5.13-6.06)                                       | 2.65 (2.33-2.97)                                             |
| 5                                                              | 3.48 (3.11-3.84)                                                | 10.35 (9.72-10.98)                                      | 3.91 (3.52-4.29)                                       | 3.27 (2.91-3.62)                                             |
| Number of yearly interviews on which this behavior occurred... |                                                                 |                                                         |                                                        |                                                              |
| 0                                                              | 76.40 (74.69-78.11)                                             | 46.67 (45.34-48.01)                                     | 71.07 (69.42-72.72)                                    | 66.02 (64.43-67.61)                                          |
| 1                                                              | 7.08 (6.56-7.60)                                                | 25.34 (24.36-26.33)                                     | 15.63 (14.85-16.40)                                    | 11.53 (10.87-12.20)                                          |
| 2                                                              | 4.84 (4.41-5.28)                                                | 14.78 (14.03-15.54)                                     | 6.12 (5.64-6.61)                                       | 6.73 (6.23-7.24)                                             |
| 3                                                              | 2.36 (2.06-2.66)                                                | 8.03 (7.47-8.58)                                        | 3.70 (3.32-4.07)                                       | 5.31 (4.85-5.76)                                             |
| 4                                                              | 2.48 (2.18-2.79)                                                | 3.48 (3.12-3.85)                                        | 1.90 (1.63-2.17)                                       | 6.43 (5.93-6.93)                                             |
| 5                                                              | 2.24 (1.94-2.53)                                                | 1.27 (1.05-1.49)                                        | 1.27 (1.05-1.49)                                       | 3.98 (3.59-4.37)                                             |
| 6                                                              | 4.60 (4.18-5.02)                                                | 0.42 (0.30-0.55)                                        | 0.32 (0.21-0.43)                                       |                                                              |

Abbreviation: OME, oral morphine equivalent.

**eTable 5: Complete Case Analysis of Prevalence, Incidence and Cessation of a Range of Indicators of Extramedical Opioid Use and Harm**

| <b>Outcomes</b>                                              | <b>Tampered with medication or used via other route (eg, injection)<br/>% (95%CI)<br/>N = 941</b> | <b>Sold or gave own prescribed opioids to another person<br/>% (95%CI)<br/>N = 946</b> | <b>ICD-10 pharmaceutical opioid dependence<br/>% (95%CI)<br/>N = 972</b> |
|--------------------------------------------------------------|---------------------------------------------------------------------------------------------------|----------------------------------------------------------------------------------------|--------------------------------------------------------------------------|
| Prevalence of this behaviour at, y                           |                                                                                                   |                                                                                        |                                                                          |
| baseline                                                     | 5.95 (5.47-6.43)                                                                                  | 0.53 (0.39-0.67)                                                                       | 16.78 (15.98-17.58)                                                      |
| 1                                                            | 8.93 (8.34-9.51)                                                                                  | 1.48 (1.24-1.72)                                                                       |                                                                          |
| 2                                                            | 6.80 (6.29-7.31)                                                                                  | 0.42 (0.30-0.55)                                                                       | 11.56 (10.90-12.23)                                                      |
| 3                                                            | 5.84 (5.37-6.32)                                                                                  | 0.74 (0.57-0.91)                                                                       | 16.37 (15.58-17.17)                                                      |
| 4                                                            | 4.46 (4.05-4.88)                                                                                  | 0.85 (0.67-1.03)                                                                       | 9.68 (9.07-10.29)                                                        |
| 5                                                            | 3.08 (2.74-3.43)                                                                                  | 0.63 (0.48-0.79)                                                                       | 7.08 (6.56-7.60)                                                         |
| Incidence of this behaviour (from previous year) at, y       |                                                                                                   |                                                                                        |                                                                          |
| 1                                                            | 6.80 (6.29-7.31)                                                                                  | 1.37 (1.14-1.60)                                                                       |                                                                          |
| 2                                                            | 4.78 (4.35-5.21)                                                                                  | 0.32 (0.21-0.43)                                                                       |                                                                          |
| 3                                                            | 4.68 (4.25-5.10)                                                                                  | 0.74 (0.57-0.91)                                                                       | 13.70 (12.98-14.42)                                                      |
| 4                                                            | 3.08 (2.74-3.43)                                                                                  | 0.74 (0.57-0.91)                                                                       | 4.40 (3.99-4.81)                                                         |
| 5                                                            | 1.70 (1.44-1.96)                                                                                  | 0.42 (0.30-0.55)                                                                       | 2.97 (2.63-3.31)                                                         |
| Cessation of this behaviour (from previous year) at, y       |                                                                                                   |                                                                                        |                                                                          |
| 1                                                            | 3.83 (3.44-4.21)                                                                                  | 0.42 (0.30-0.55)                                                                       |                                                                          |
| 2                                                            | 6.91 (6.39-7.42)                                                                                  | 1.37 (1.14-1.60)                                                                       |                                                                          |
| 3                                                            | 5.63 (5.17-6.10)                                                                                  | 0.42 (0.30-0.55)                                                                       | 8.90 (8.32-9.49)                                                         |
| 4                                                            | 4.46 (4.05-4.88)                                                                                  | 0.63 (0.48-0.79)                                                                       | 10.69 (10.05-11.33)                                                      |
| 5                                                            | 3.08 (2.74-3.43)                                                                                  | 0.63 (0.48-0.79)                                                                       | 8.91 (8.33-9.49)                                                         |
| Number of yearly interviews on which this behaviour occurred |                                                                                                   |                                                                                        |                                                                          |
| 0                                                            | 76.73 (75.01-78.44)                                                                               | 96.09 (94.17-98.01)                                                                    | 73.77 (72.08-75.45)                                                      |
| 1                                                            | 16.37 (15.57-17.16)                                                                               | 3.28 (2.92-3.63)                                                                       | 13.79 (13.06-14.51)                                                      |
| 2                                                            | 3.72 (3.34-4.10)                                                                                  | 0.53 (0.39-0.67)                                                                       | 5.56 (5.09-6.02)                                                         |
| 3                                                            | 2.13 (1.84-2.41)                                                                                  | 0.11 (0.04-0.17)                                                                       | 3.60 (3.23-3.97)                                                         |
| 4                                                            | 0.43 (0.30-0.55)                                                                                  | 0.00(0.00-0.00)                                                                        | 2.16 (1.87-2.45)                                                         |
| 5                                                            | 0.64 (0.48-0.79)                                                                                  | 0.00(0.00-0.00)                                                                        | 1.13 (0.92-1.34)                                                         |
| 6                                                            | 0.00(0.00-0.00)                                                                                   | 0.00(0.00-0.00)                                                                        |                                                                          |

<sup>a</sup> As the 1-year follow-up was a self-completed questionnaire, we did not have data for ICD-10 pharmaceutical opioid dependence.

**eFigure 3: Prevalence, incidence and remission of a range of opioid use behaviors and indicators of extramedical opioid use and harm (complete case data)**

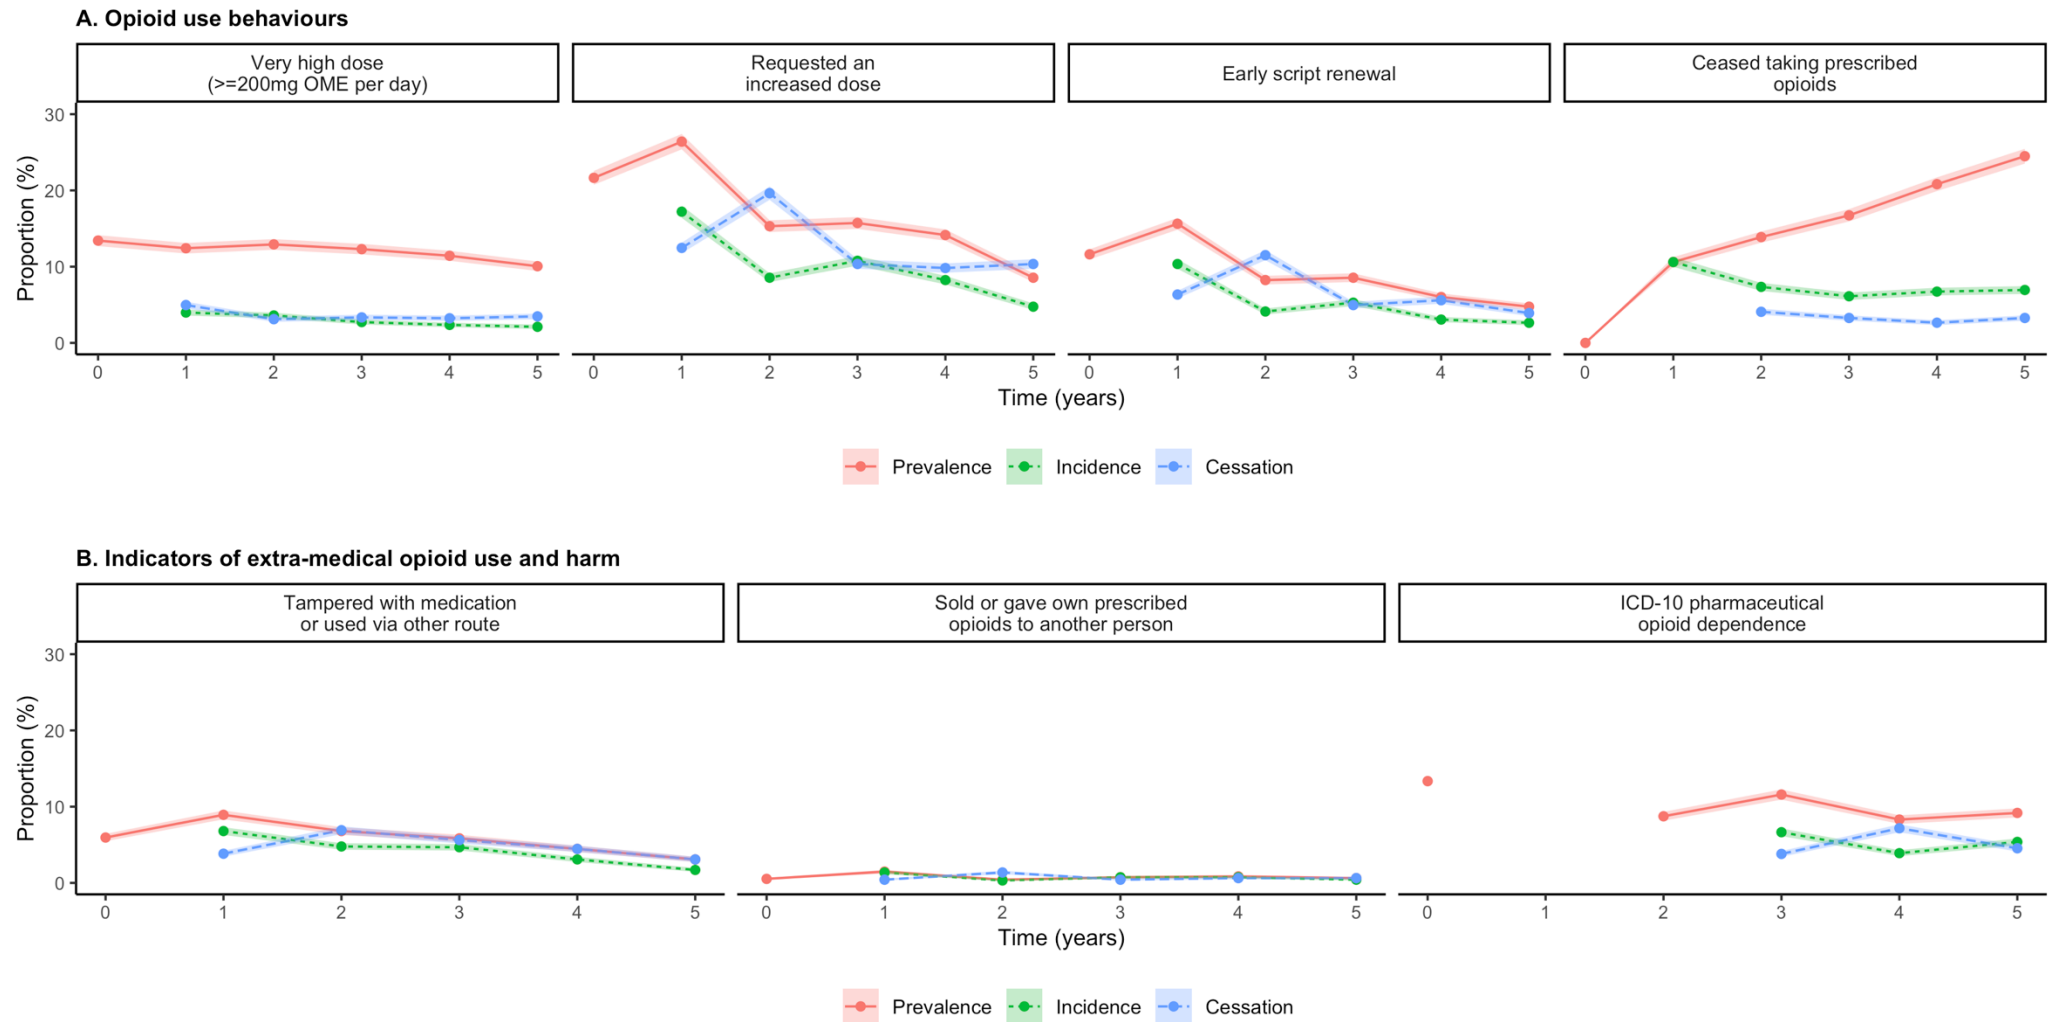

As the 1-year follow-up was a self-completed questionnaire, we did not have data for *ICD-10* pharmaceutical opioid dependence. This is complete case data.

**eTable 6: Percentage of People Engaging in a Behavior on 1 Interview who CEASED That Behavior in the Following Interview (Imputed Data; Percentages are of Those Engaging in the Behaviors at the Previous Interview, not the Whole POINT Cohort)**

|                                                          |                                                                          |
|----------------------------------------------------------|--------------------------------------------------------------------------|
| % cessation of this behaviour (from previous year) at, y | <b>Very high dose (<math>\geq 200</math> mg OME per day)</b>             |
| 1                                                        | 52.28 (50.87-53.70)                                                      |
| 2                                                        | 35.41 (34.25-36.58)                                                      |
| 3                                                        | 35.93 (34.76-37.10)                                                      |
| 4                                                        | 33.93 (32.79-35.06)                                                      |
| 5 years                                                  | 39.35 (38.13-40.58)                                                      |
| % cessation of this behaviour (from previous year) at, y | <b>Requested an increased dose</b>                                       |
| 1                                                        | 62.87 (61.32-64.42)                                                      |
| 2                                                        | 75.17 (73.48-76.87)                                                      |
| 3                                                        | 69.00 (67.38-70.62)                                                      |
| 4                                                        | 68.17 (66.55-69.78)                                                      |
| 5                                                        | 76.62 (74.90-78.33)                                                      |
| % cessation of this behaviour (from previous year) at, y | <b>Early script renewal</b>                                              |
| 1                                                        | 60.66 (59.14-62.18)                                                      |
| 2                                                        | 74.86 (73.17-76.55)                                                      |
| 3                                                        | 67.17 (65.57-68.76)                                                      |
| 4                                                        | 69.02 (67.40-70.64)                                                      |
| 5                                                        | 74.02 (72.34-75.70)                                                      |
| % cessation of this behaviour (from previous year) at, y | <b>Ceased taking prescribed opioids</b>                                  |
| 1                                                        |                                                                          |
| 2                                                        | 42.58 (41.30-43.85)                                                      |
| 3                                                        | 31.21 (30.11-32.30)                                                      |
| 4                                                        | 19.83 (18.96-20.70)                                                      |
| 5                                                        | 21.00 (20.10-21.89)                                                      |
| % cessation of this behaviour (from previous year) at, y | <b>Tampered with medication or used via other route (e.g. injection)</b> |
| 1                                                        | 72.21 (70.55-73.87)                                                      |
| 2                                                        | 81.09 (79.33-82.84)                                                      |
| 3                                                        | 81.48 (79.72-83.24)                                                      |
| 4                                                        | 80.63 (78.88-82.38)                                                      |
| 5                                                        | 74.48 (72.80-76.15)                                                      |
| % cessation of this behaviour (from previous year) at, y | <b>Sold or gave own prescribed opioids to another person</b>             |
| 1                                                        | 92.31 (90.50-94.12)                                                      |
| 2                                                        | 94.66 (92.80-96.52)                                                      |
| 3                                                        | 100.00 (98.19-101.81)                                                    |
| 4                                                        | 88.26 (86.53-89.99)                                                      |
| 5                                                        | 79.09 (77.44-80.74)                                                      |
| % cessation of this behaviour (from previous year) at, y | <b>ICD-10 pharmaceutical opioid dependence <sup>a</sup></b>              |
| 1                                                        | <i>a</i>                                                                 |
| 2                                                        | <i>a</i>                                                                 |
| 3                                                        | 55.26 (53.81-56.71)                                                      |
| 4                                                        | 64.44 (62.87-66.00)                                                      |
| 5                                                        | 61.50 (59.97-63.04)                                                      |

Abbreviation: OME, oral morphine equivalent; POINT, .

<sup>a</sup>These are imputed data.

<sup>b</sup>As the 1-year follow-up was a self-completed questionnaire, we did not have data for *ICD-10* pharmaceutical opioid dependence.

**eTable 7: Percentage of People Engaging in a Behavior on 1 Interview Who CEASED That Behavior in the Following Interview**

|                                                          |                                                                        |
|----------------------------------------------------------|------------------------------------------------------------------------|
| % cessation of this behaviour (from previous year) at, y | <b>Very high dose (&gt;=200mg OME per day)</b>                         |
| 1                                                        | 37.04 (35.85-38.22)                                                    |
| 2                                                        | 25.00 (24.02-25.98)                                                    |
| 3                                                        | 25.96 (24.97-26.96)                                                    |
| 4                                                        | 26.26 (25.26-27.26)                                                    |
| 5                                                        | 30.43 (29.36-31.51)                                                    |
| % cessation of this behaviour (from previous year) at, y | <b>Requested an increased dose</b>                                     |
| 1                                                        | 57.56 (56.08-59.04)                                                    |
| 2                                                        | 74.40 (72.71-76.09)                                                    |
| 3                                                        | 67.59 (65.98-69.19)                                                    |
| 4                                                        | 62.42 (60.87-63.96)                                                    |
| 5                                                        | 73.13 (71.46-74.80)                                                    |
| % cessation of this behaviour (from previous year) at, y | <b>Early script renewal</b>                                            |
| 1                                                        | 54.55 (53.10-55.99)                                                    |
| 2                                                        | 73.65 (71.97-75.33)                                                    |
| 3                                                        | 60.26 (58.74-61.77)                                                    |
| 4                                                        | 65.43 (63.86-67.01)                                                    |
| 5                                                        | 64.91 (63.35-66.48)                                                    |
| % cessation of this behaviour (from previous year) at, y | <b>Ceased taking prescribed opioids</b>                                |
| 1                                                        |                                                                        |
| 2                                                        | 38.46 (37.25-39.67)                                                    |
| 3                                                        | 23.53 (22.58-24.48)                                                    |
| 4                                                        | 15.85 (15.08-16.63)                                                    |
| 5                                                        | 15.69 (14.91-16.46)                                                    |
| % cessation of this behaviour (from previous year) at, y | <b>Tampered with medication or used via other route (eg injection)</b> |
| 1                                                        | 64.29 (62.73-65.84)                                                    |
| 2                                                        | 77.38 (75.67-79.09)                                                    |
| 3                                                        | 82.81 (81.04-84.58)                                                    |
| 4                                                        | 76.36 (74.67-78.06)                                                    |
| 5                                                        | 69.05 (67.44-70.66)                                                    |
| % cessation of this behaviour (from previous year) at, y | <b>Sold or gave own prescribed opioids to another person</b>           |
| 1                                                        | 80.00 (78.43-81.57)                                                    |
| 2                                                        | 92.86 (91.04-94.68)                                                    |
| 3                                                        | 100.00 (98.30-101.70)                                                  |
| 4                                                        | 85.71 (84.03-87.39)                                                    |
| 5                                                        | 75.00 (73.41-76.59)                                                    |
| % cessation of this behaviour (from previous year) at, y | <b>ICD-10 pharmaceutical opioid dependence</b>                         |
| 1                                                        |                                                                        |
| 2                                                        |                                                                        |
| 3                                                        | 43.37 (42.09-44.66)                                                    |
| 4                                                        | 61.82 (60.28-63.35)                                                    |
| 5                                                        | 54.43 (52.99-55.87)                                                    |

<sup>a</sup> As the 1-year follow-up was a self-completed questionnaire, we did not have data for *ICD-10* pharmaceutical opioid dependence

**eTable 8: Sensitivity Analysis ORBIT Items (Past 3 Month Use Only; Prevalence, Incidence, Number of Interviews)<sup>a</sup>**

| Outcomes                                                     | Requested an increased dose | Early script renewal | Tampered with medication or used via other route (e.g. injection) | Sold or gave own prescribed opioids to another person % (95%CI) |
|--------------------------------------------------------------|-----------------------------|----------------------|-------------------------------------------------------------------|-----------------------------------------------------------------|
|                                                              | % (95%CI)                   | % (95%CI)            | % (95%CI)                                                         |                                                                 |
| Prevalence of this behaviour at, y                           |                             |                      |                                                                   |                                                                 |
| baseline                                                     | 21.18 (20.28-22.08)         | 12.30 (11.61-12.99)  | 6.89 (6.37-7.40)                                                  | 0.86 (0.68-1.04)                                                |
| 1                                                            | 24.92 (23.94-25.89)         | 14.65 (13.90-15.40)  | 8.24 (7.67-8.80)                                                  | 1.45 (1.22-1.69)                                                |
| 2                                                            | 16.34 (15.55-17.13)         | 9.18 (8.59-9.78)     | 6.74 (6.24-7.25)                                                  | 0.51 (0.37-0.65)                                                |
| 3                                                            | 17.80 (16.97-18.62)         | 9.44 (8.84-10.04)    | 6.26 (5.77-6.75)                                                  | 0.69 (0.52-0.85)                                                |
| 4                                                            | 15.27 (14.50-16.03)         | 7.12 (6.60-7.64)     | 4.71 (4.29-5.14)                                                  | 0.82 (0.64-0.99)                                                |
| 5                                                            | 10.30 (9.67-10.93)          | 5.61 (5.14-6.07)     | 3.73 (3.35-4.11)                                                  | 0.65 (0.49-0.81)                                                |
| Incidence of this behaviour (from previous year) at, y       |                             |                      |                                                                   |                                                                 |
| 1                                                            | 16.64 (15.84-17.44)         | 9.59 (8.98-10.20)    | 6.22 (5.73-6.71)                                                  | 1.38 (1.15-1.61)                                                |
| 2                                                            | 9.89 (9.28-10.51)           | 5.38 (4.93-5.84)     | 5.19 (4.75-5.64)                                                  | 0.44 (0.31-0.57)                                                |
| 3                                                            | 12.24 (11.55-12.92)         | 6.22 (5.73-6.70)     | 4.87 (4.43-5.30)                                                  | 0.70 (0.54-0.87)                                                |
| 4                                                            | 9.29 (8.69-9.89)            | 4.19 (3.79-4.59)     | 3.27 (2.91-3.62)                                                  | 0.75 (0.58-0.92)                                                |
| 5                                                            | 6.30 (5.81-6.79)            | 3.61 (3.24-3.98)     | 2.46 (2.15-2.77)                                                  | 0.47 (0.34-0.61)                                                |
| Cessation of this behaviour (from previous year) at, y       |                             |                      |                                                                   |                                                                 |
| 1                                                            | 13.05 (12.34-13.76)         | 7.26 (6.73-7.79)     | 5.00 (4.56-5.44)                                                  | 0.83 (0.65-1.01)                                                |
| 2                                                            | 18.50 (17.66-19.34)         | 10.61 (9.97-11.25)   | 6.60 (6.09-7.10)                                                  | 1.35 (1.12-1.57)                                                |
| 3                                                            | 11.34 (10.68-12.00)         | 6.20 (5.71-6.69)     | 5.56 (5.10-6.02)                                                  | 0.40 (0.27-0.52)                                                |
| 4                                                            | 11.78 (11.10-12.45)         | 6.09 (5.61-6.57)     | 5.15 (4.71-5.60)                                                  | 0.65 (0.50-0.81)                                                |
| 5                                                            | 11.78 (11.10-12.45)         | 5.08 (4.64-5.52)     | 3.71 (3.33-4.09)                                                  | 0.70 (0.54-0.86)                                                |
| Number of yearly interviews on which this behaviour occurred |                             |                      |                                                                   |                                                                 |
| 0                                                            | 43.36 (42.07-44.65)         | 66.80 (65.20-68.40)  | 74.17 (72.49-75.86)                                               | 95.45 (93.54-97.37)                                             |
| 1                                                            | 27.73 (26.70-28.76)         | 19.31 (18.44-20.17)  | 18.34 (17.50-19.18)                                               | 3.95 (3.56-4.34)                                                |
| 2                                                            | 15.80 (15.02-16.58)         | 6.31 (5.82-6.80)     | 4.53 (4.11-4.95)                                                  | 0.50 (0.36-0.63)                                                |
| 3                                                            | 8.43 (7.86-9.00)            | 3.82 (3.43-4.20)     | 1.86 (1.59-2.13)                                                  | 0.10 (0.04-0.16)                                                |
| 4                                                            | 3.12 (2.77-3.46)            | 2.19 (1.90-2.48)     | 0.51 (0.37-0.65)                                                  | 0.00 (0.00-0.00)                                                |
| 5                                                            | 1.18 (0.96-1.39)            | 1.28 (1.06-1.50)     | 0.59 (0.44-0.74)                                                  | 0.00 (0.00-0.00)                                                |
| 6                                                            | 0.39 (0.27-0.52)            | 0.30 (0.19-0.41)     | 0.00 (0.00-0.00)                                                  | 0.00 (0.00-0.00)                                                |

<sup>a</sup>These are imputed data. Results are based on those who had used opioids within the last 3 months.

**eTable 9: Associations Between Demographic and Clinical Variables and Indicators for Past year Dependence (Years 2-5 Only Imputed Data)<sup>a</sup>**

|                                                | ICD-10 pharmaceutical opioid dependence |
|------------------------------------------------|-----------------------------------------|
|                                                | OR (95%CI)                              |
| <b>Demographics</b>                            |                                         |
| Aged younger than 58 y                         | 4.08 (2.31- 7.22) <sup>b</sup>          |
| Men                                            | 1.55 (0.94- 2.55)                       |
| <b>Employment</b>                              |                                         |
| Employed                                       | 1 [Reference]                           |
| Unemployed                                     | 0.53 (0.23- 1.25)                       |
| Retired                                        | 1.36 (0.67- 2.76)                       |
| ARIA <sup>c</sup> (Major City)                 | 1.22 (0.72- 2.06)                       |
| <b>Pain and Physical Health</b>                |                                         |
| Years living with pain                         | 1.00 (1.00-1.00)                        |
| High pain severity ( $\geq 7$ on BPI)          | 2.10 (1.21- 3.64) <sup>b</sup>          |
| High pain interference ( $\geq 7$ on BPI)      | 3.39 (1.93- 5.96) <sup>b</sup>          |
| Low pain self-efficacy and coping (PSEQ < 30)  | 2.42 (1.56- 3.75) <sup>b</sup>          |
| PODS moderate-high                             | 10.36 (5.00-21.49) <sup>b</sup>         |
| <b>Mental health and substance use history</b> |                                         |
| Moderate-severe depression (PHQ)               | 7.12 (4.37-11.60) <sup>b</sup>          |
| Moderate-severe GAD                            | 5.85 (3.25-10.53) <sup>b</sup>          |
| Childhood abuse/neglect                        | 2.16 (1.22- 3.83) <sup>b</sup>          |
| Lifetime ICD-10 substance dependence           | 2.87 (1.59- 5.17) <sup>b</sup>          |
| $\geq 200$ mg OME per day                      | 3.58 (2.04- 6.25) <sup>b</sup>          |

Abbreviations: GAD, generalized anxiety disorder; OME, oral morphine equivalent; PHQ, patient health questionnaire; PSEQ, pain self-efficacy score.

<sup>a</sup>Note: Associations examined using generalised linear mixed models.

<sup>b</sup>No. indicates significant at  $P < .05$  level.

<sup>c</sup>Accessibility/Remoteness Index of Australia Plus.

## References

1. Rubin DB. Multiple imputation for nonresponse in surveys. John Wiley and Sons; 2004.
2. Buuren Sv, Groothuis-Oudshoorn K. mice: Multivariate imputation by chained equations in R. *J Stat Software*. 2010;1-68.
3. Bodner TE. What improves with increased missing data imputations? *Struct Equation Model Multi J* 2008; 15(4): 651-675.
4. White IR, Royston P, Wood AM. Multiple imputation using chained equations: issues and guidance for practice. *Stat Med*. 2011; 30(4): 377-399.
5. Enders CK. Applied missing data analysis. Guilford press; 2010.
6. Graham JW. Missing data analysis: ,aking it work in the real world. *Annual Rev Psych*. 2009; 60: 549-576.
7. Allison PD. Missing data. Sage; 2001.
8. Collins LM, Schafer JL, Kam C-M. A comparison of inclusive and restrictive strategies in modern missing data procedures. *Psych Methods*. 2001; 6(4): 330.
9. Larance B, Bruno R, Lintzeris N, et al. Development of a brief tool for monitoring aberrant behaviours among patients receiving long-term opioid therapy: the Opioid-Related Behaviours in Treatment (ORBIT) scale. *Drug Alcohol Dep*. 2016; 159: 42-52.
